# Supplementary material
Source: PubMed Central journal article supplement (PMC2898582)

## SUPPLEMENTARY FIGURES

**Supplementary Figure 1** Expression of the dominant negative mutant ER $\alpha$ , ER $\alpha\Delta 250-260$ , or the Gai binding domain blocking peptide, ER $\alpha$  peptide 251-260, does not alter nuclear ER function in endothelial cells. BAEC were cotransfected with 3ERE-Luc luciferase reporter plasmid and either sham plasmid (control), plasmid encoding the dominant-negative mutant receptor ER $\alpha\Delta 250-260$  that prevents non-nuclear ER activation of eNOS, or plasmid that expresses a peptide consisting of amino acids 251-260 of the receptor (ER $\alpha$  peptide 251-260) that blocks ER $\alpha$ -Gai interaction. Reporter activity was then determined 24h later in response to 48h treatment with vehicle (Basal) or  $10^{-8}$ M E<sub>2</sub>. Values are mean $\pm$ SEM, n=4, \* p<0.05 vs. basal.

**Supplementary Figure 2** EDC does not activate ER-mediated gene transcription in vivo. (A) Optical imaging is shown of the bioluminescence emitted from a representative ERE-luc reporter mouse treated with vehicle (control), E<sub>2</sub> or EDC via osmotid minipump for 24 or 48h. (B) Summary data, values are mean $\pm$ SEM, n=6, (control is set at 1) \* p<0.05 vs. Control.

**Supplementary Figure 3** Tissue distribution of EDC. Mice received <sup>3</sup>H-labeled EDC as a single IP injection of 6  $\mu$ g of E<sub>2</sub> equivalents, and tissues were harvested 2, 24 and 72h later. EDC abundance was quantified by liquid scintillation counting, and is expressed as % injected dose/gram of tissue. Values are means for two mice at each timepoint.

**Supplementary Figure 4** Carotid artery reendothelialization mediated by nongenomic ER activation requires ER $\alpha$ , and residues within the A/B domain of ER $\alpha$  are dispensable for this process. (A) The intimal surfaces of Evans blue-stained arteries from dendrimer (Dend) or EDC-treated ER $\alpha^{+/+}$  versus ER $\alpha^{-/-}$  littermates are shown (upper panel). Area

of denudation was quantified and expressed in arbitrary units (lower panel). In **A**, values are mean $\pm$ SEM, n=6-8, \*p<0.05 vs dendrimer. Similar experiments were performed in vehicle versus E<sub>2</sub> or dendrimer versus EDC-treated wild-type mice (**B**) and in comparably-treated *ER $\alpha$ -Neo* knockout mice expressing a truncated 55 kDa ER $\alpha$  (**C**). In **B** and **C**, values are mean $\pm$ SEM, n=7-12, \* p<0.05 vs. vehicle or dendrimer.

**Supplementary Figure 5** Non-nuclear ER signaling does not promote endometrial cell growth. (**A**) ERK phosphorylation: Ishikawa cells were treated for 0-15 min with DMSO (vehicle control), 10<sup>-8</sup>M E<sub>2</sub>, dendrimer, or EDC (10<sup>-8</sup>M E<sub>2</sub> equivalents), and ERK phosphorylation was evaluated by immunoblot analyses for phospho-ERK (pERK) and total ERK (tERK). Summary data are shown in **B**, in which values are mean $\pm$ SEM, n=3, \*p<0.05 vs. time 0. (**C**) Cell growth: Cells were treated daily with the reagents in **A**, and cell number was quantified every 24h. 1% FBS was used as a positive control. Values are mean $\pm$ SEM for cell number expressed as % of plated cells, n=3, \* p<0.05 vs. DMSO.

**Supplementary Figure 6** Pertussis toxin attenuates the carotid vascular conductance response to acetylcholine (Ach). Ovariectomized, E<sub>2</sub>-treated mice were administered the B-oligomer of pertussis toxin (open symbol) or intact pertussis toxin (PTX, closed symbol), and 3 d later were instrumented for measurements of carotid artery vascular conductance. Responses to varying doses of Ach were tested in random order. Values are mean $\pm$ SEM, n=5, \*p<0.05 vs B-oligomer.

# Supplementary Fig. 1

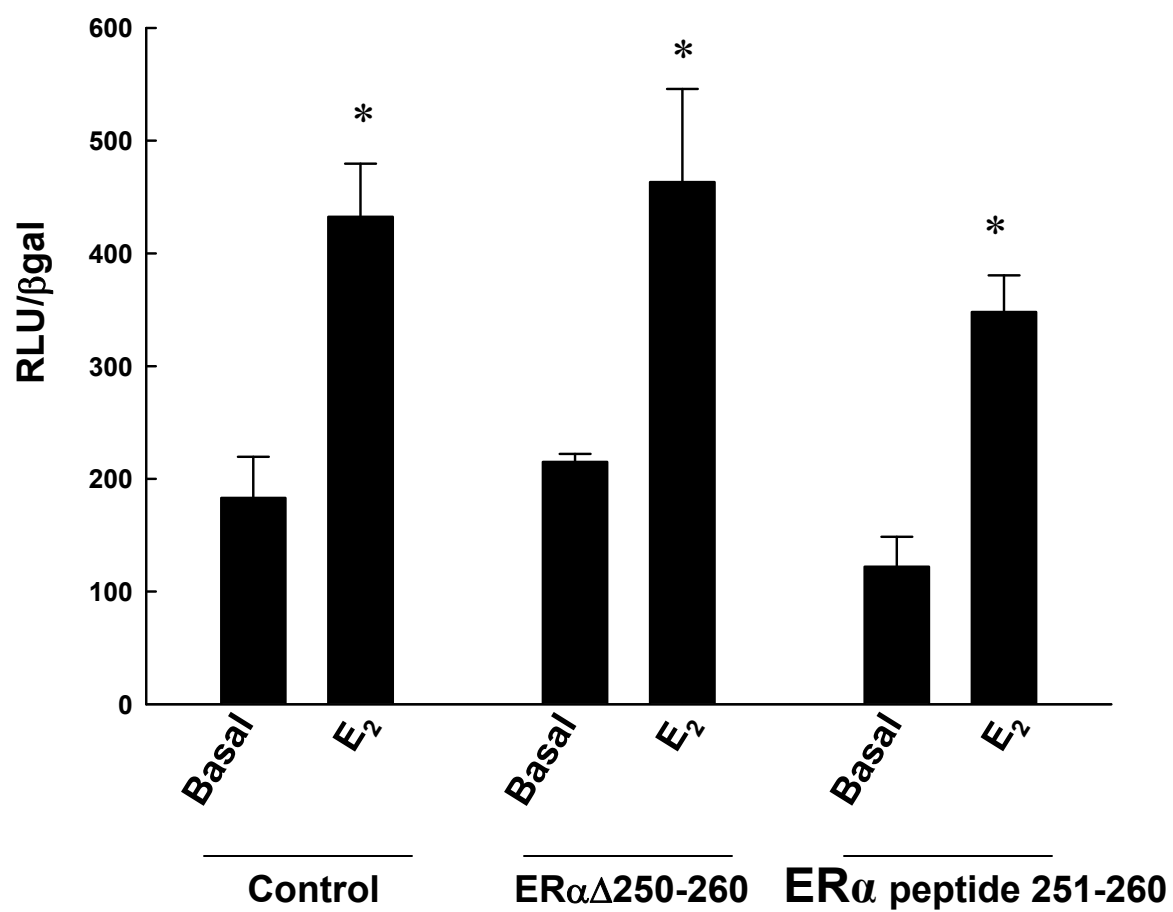

# Supplementary Fig. 2

## A

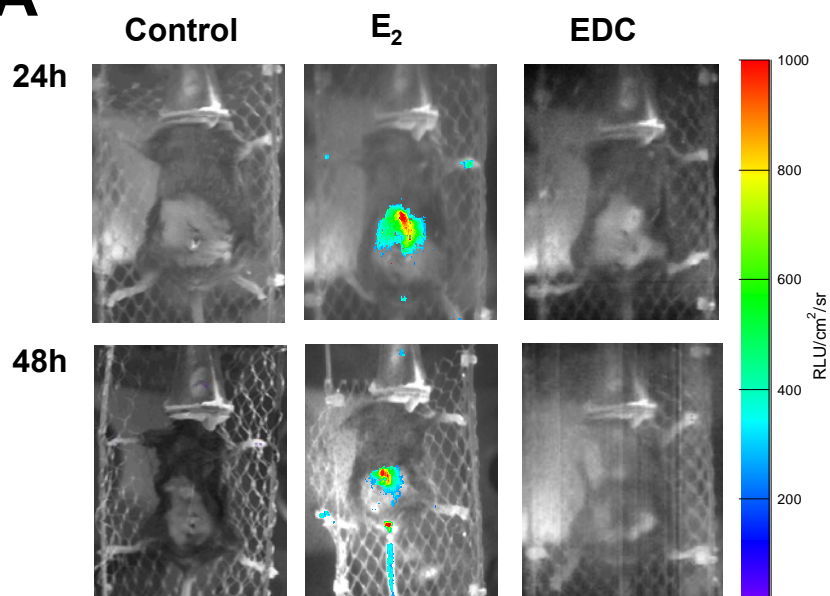

## B

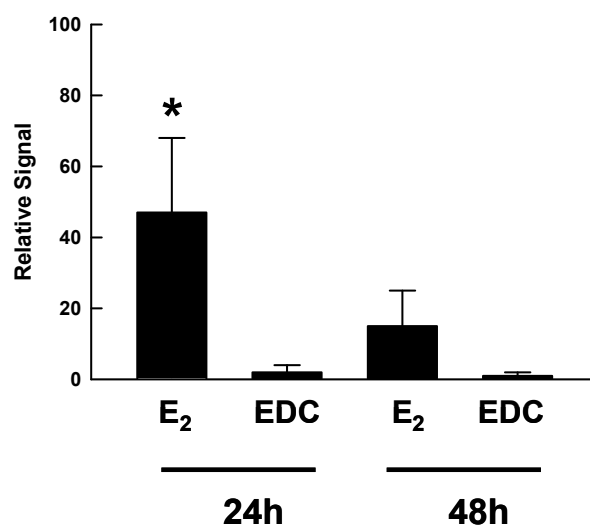

# Supplementary Fig. 3

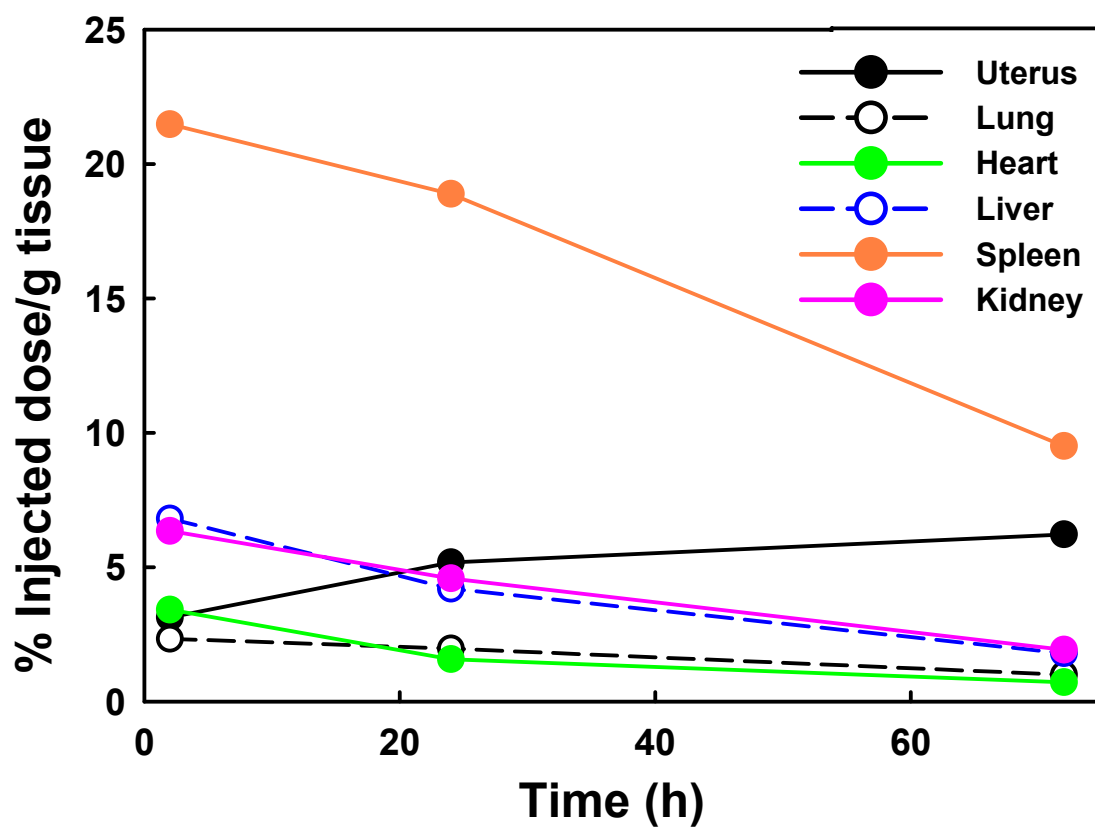

# Supplementary Fig. 4

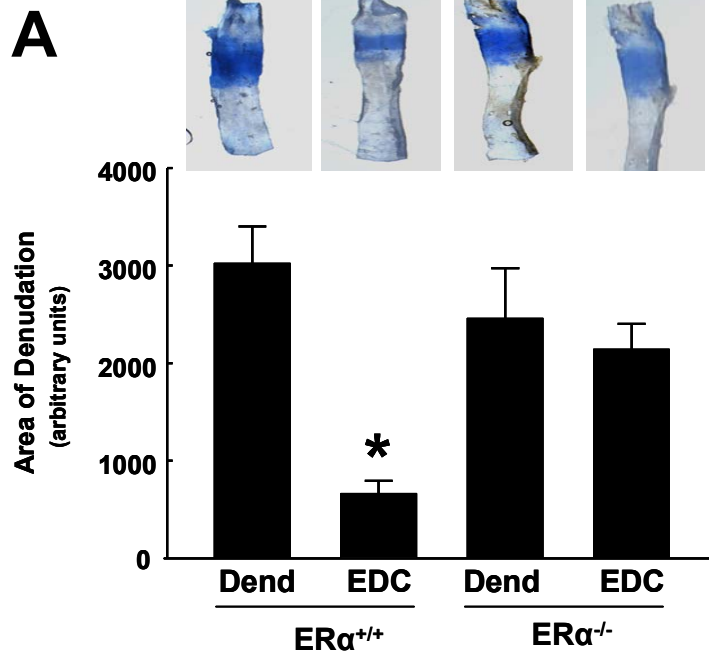

## **B** WT $ER\alpha$

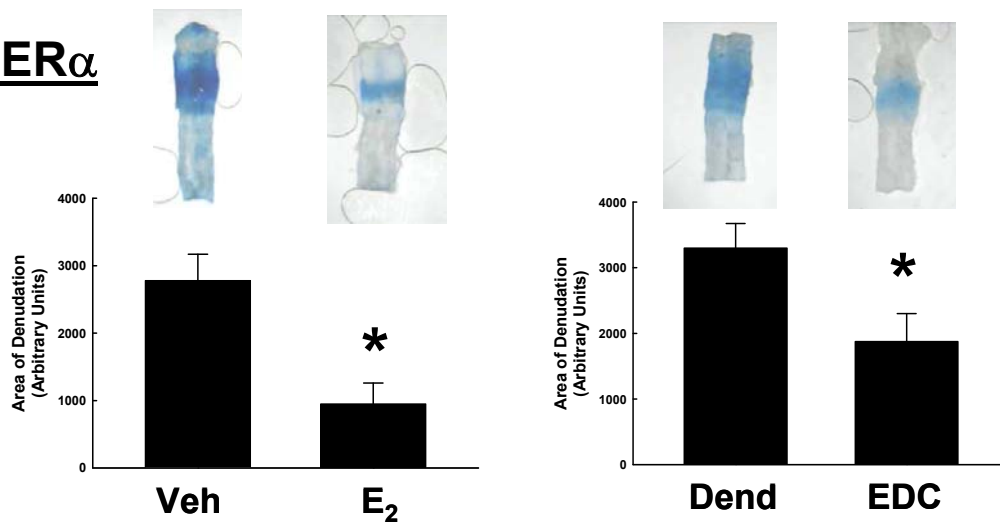

## **C** $ER\alpha$ -Neo

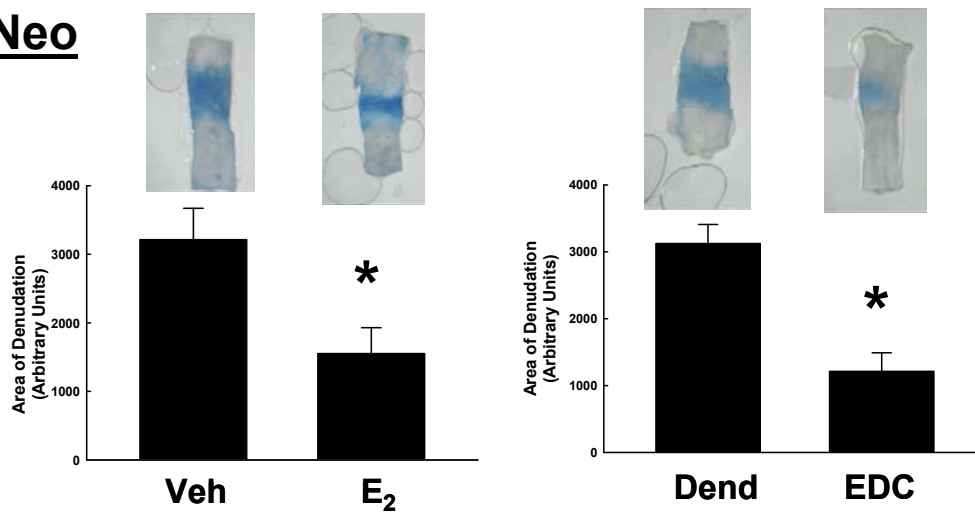

# Supplementary Fig. 5

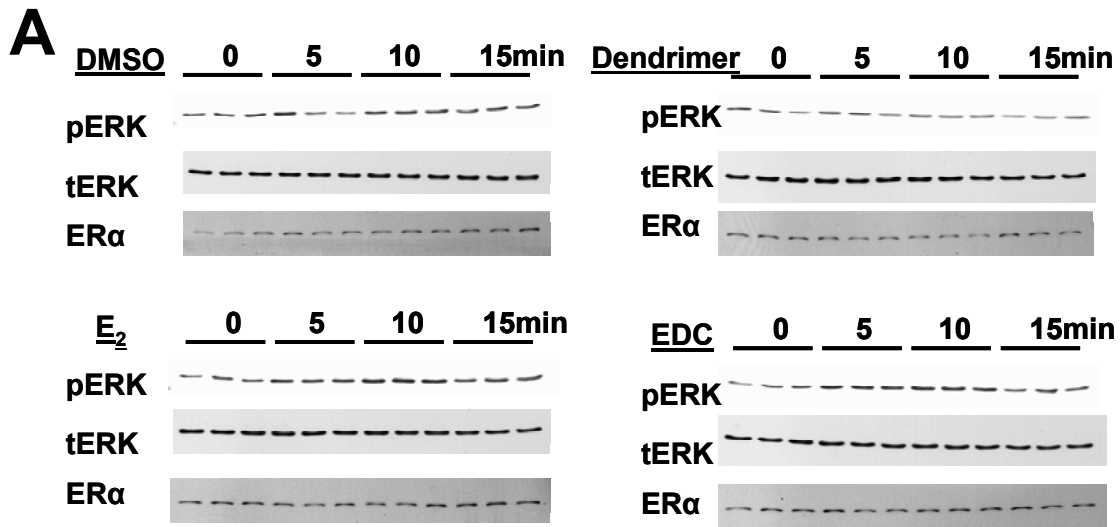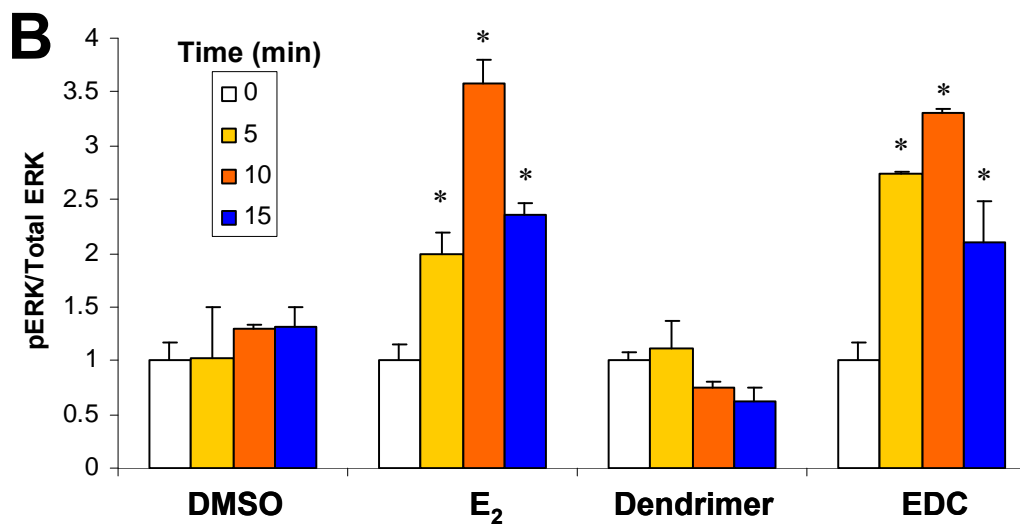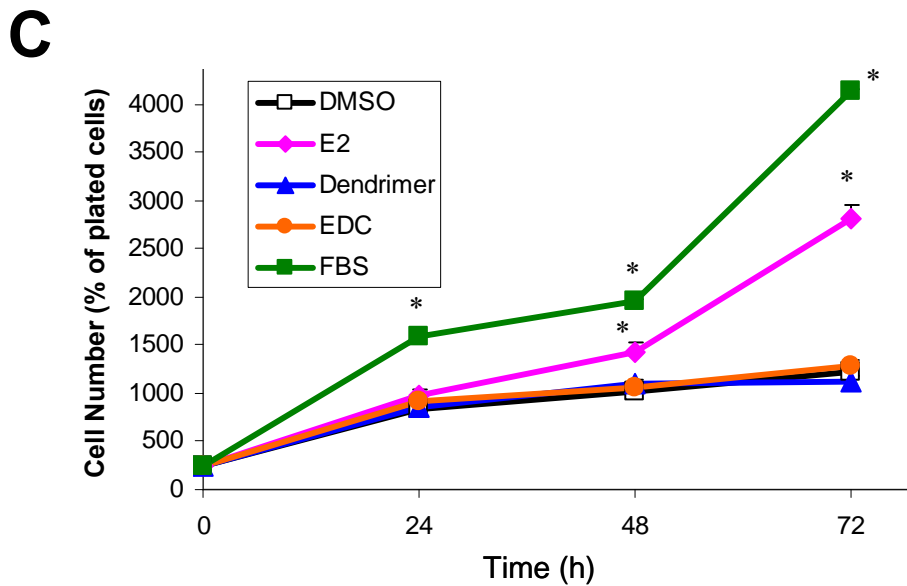

# Supplementary Fig. 6

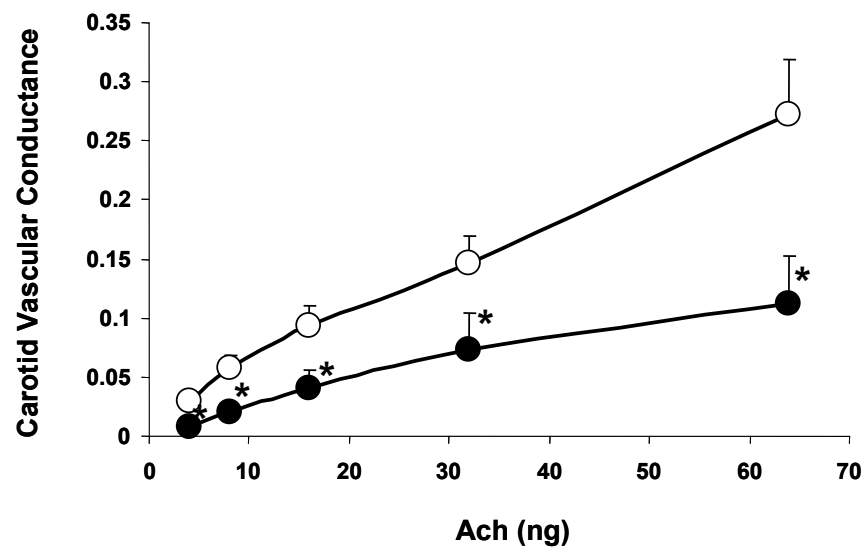

Supplement: JCI38291sd.pdf [file JCI38291sd.pdf]
